# Supplementary material for: bamSliceR: cross-cohort variant and allelic bias analysis for rare variants and rare diseases
Source: PubMed Central journal article supplement (PMC10516001; doi:10.1101/2023.09.15.558026), 2023-09-17

## Supplemental data

(Each table should be a separate excel file.)

### Table S1

#### Co-occurrence status of *H3K27M* and *IDH2* mutations in TARGET-AML and BEAT-AML.

Identification of 9 pAML patients that harbored K27M mutation on Histone 3 genes based on evidence of VAF > 0.15 and total read depth > 8 and whether the mutation can be captured by both RNA-seq and WGS data.

Co-occurrence of *H3F3A* (H3.3) *K27M* and *IDH2* *R172K* are shown in 2 pAML patients. Co-occurrence of *H3K27M* (H3.3 & H3.1) and *IDH2* *R140Q/R172K* are shown in 5 adult AML patients.

|      | CASE_ID | SYMBOL         | H3K27M     |            |            |            | IDH2   |            |            |            |            |
|------|---------|----------------|------------|------------|------------|------------|--------|------------|------------|------------|------------|
|      |         |                | DNA-vaf-T1 | DNA-vaf-T2 | RNA-vaf-T1 | RNA-vaf-T2 | SYMBOL | DNA-vaf-T1 | DNA-vaf-T2 | RNA-vaf-T1 | RNA-vaf-T2 |
| H3.3 | PARBTV  | H3F3A          | 47%        | 48%        | 47%        | 47%        | R172K  | 38%        | 48%        | 56%        | 59%        |
|      | PAVDMY  | H3F3A          |            |            | 49%        | 47%/47%    | R172K  |            |            | 39%        | 40%/48%    |
| H3.1 | PAPVGE  | HIST1H3C       |            |            | 58%        |            | -      |            |            | -          |            |
|      | PAUZTH  | HIST1H3J(K27I) |            |            | 0%         | 38%        | -      |            |            | -          | -          |
|      | PAUUPR  | HIST1H3I       |            |            | 0%         | 35%        | -      |            |            | -          | -          |
|      | PAKWCU  | HIST1H3D       |            |            | 17%        |            | -      |            |            | -          |            |
|      | PAXFAG  | HIST1H3C       |            |            | 54%        |            | -      |            |            | -          |            |
|      | PAXKAL  | HIST1H3I       |            |            | 50%        |            | -      |            |            | -          |            |
|      | PATFGK  | HIST1H3C       |            |            | 50%        |            | -      |            |            | -          |            |

|      | CASE_ID | SYMBOL   | H3K27M  |             |        | IDH2   |         |         |        |
|------|---------|----------|---------|-------------|--------|--------|---------|---------|--------|
|      |         |          | DNA-vaf | RNA-vaf     | TS-vaf | SYMBOL | DNA-vaf | RNA-vaf | TS-vaf |
| H3.3 | 2148    | H3F3A    | 29%     | 47%         |        | R140Q  | 40%     | 52%     |        |
| H3.1 | 2354    | HIST1H3C | 34%/33% | low-exp     |        | R172K  | 36%/31% | 47%     |        |
|      | 2429    | HIST1H3B | 33%/47% | 35.29%/100% |        | -      | -       | -       |        |
|      | 2498    | HIST1H3C | 37%     | 38%         |        | R140Q  | 48%     | 47%     |        |
|      | 2530    | HIST1H3  | 40%     | low-exp     |        | R172K  | 46%     | 49%     |        |

|  |      |              |  |     |     |       |  |   |     |
|--|------|--------------|--|-----|-----|-------|--|---|-----|
|  |      | B            |  |     |     |       |  |   |     |
|  | 2611 | HIST1H3<br>D |  | 58% | 39% | -     |  | - | -   |
|  | 2721 | HIST1H3<br>B |  |     | 36% | R172K |  |   | 36% |

## Table S2

**H3K27 variants: published work (n=1049) and TARGET/BEAT-AML cohorts (n = 2934, via bamSliceR).**  
 Lehnertz et al. *Blood* 2017 documented 2 adult AML patients. Boileau et al. *Nat Commun* 2019 documented 4 adult AML patients. We documented 16 AML patients from TARGET and BEAT AML cohorts.

| Cohort                                                     | Cohort Size (n) | WGS/WXS (n) | RNAseq (n) | DNA Methylation (n) | H3K27M/I (%/n) |
|------------------------------------------------------------|-----------------|-------------|------------|---------------------|----------------|
| <b>Lehnertz et al. <i>Blood</i> (2017)</b>                 |                 |             |            |                     |                |
| Leucegene                                                  | 415             |             | 415        |                     | 0.48%/2        |
| <b>Boileau et al. <i>Nat Commun</i> (2019)</b>             |                 |             |            |                     |                |
| Toronto                                                    | 312             | 312         |            |                     | 0.64%/2        |
| Lebanon                                                    | 122             | 122         |            |                     | 0.8%/1         |
| TCGA                                                       | 200             | 200         | 200        | 200                 | 0.5%/1         |
| <b>Identification of H3K27M in BEAT-AML and TARGET-AML</b> |                 |             |            |                     |                |
| TARGET 20/21                                               | 2045            | 365         | 2281       | 2000                | 0.4%/9         |
| Beat-AML                                                   | 826             | 798         | 653        |                     | 0.8%/7         |

## Table S3

### Human *MLLT1* YEATS domain insertion/deletion variants identified in the pan-TARGET cohort.

| Chromosome | POS     | SYMBOL | AAchange | REFCODON      | VARCODON         | REFAA | VARAA | alt_count | total_count | VAF     | patient_id |
|------------|---------|--------|----------|---------------|------------------|-------|-------|-----------|-------------|---------|------------|
| chr19      | 6230649 | MLLT1  | V114VNHL | GTG           | GTGAACC<br>ACCTG | V     | VNHL  | 5         | 51          | 0.09804 | PASBGZ     |
| chr19      | 6230642 | MLLT1  | H116HLRP | CAC           | CACCTGC<br>GCCCC | H     | HLRP  | 2         | 460         | 0.00435 | PANGJY     |
| chr19      | 6230645 | MLLT1  | N115NPLR | AAC           | AACCCCC<br>TGCGC | N     | NPLR  | 4         | 470         | 0.00851 | PANGJY     |
| chr19      | 6230645 | MLLT1  | N115NHLR | AAC           | AACCACC<br>TGCGC | N     | NHLR  | 55        | 470         | 0.11702 | PANGJY     |
| chr19      | 6230640 | MLLT1  | HL116L   | CACCTG        | CTG              | HL    | L     | 2         | 134         | 0.01493 | PALHVV     |
| chr19      | 6230646 | MLLT1  | N115NHLH | AAC           | AACCACC<br>TGCAC | N     | NHLH  | 2         | 76          | 0.02632 | PASBPK     |
| chr19      | 6230582 | MLLT1  | LL135L   | CTCCTG        | CTG              | LL    | L     | 2         | 175         | 0.01143 | PAUMUZ     |
| chr19      | 6230611 | MLLT1  | NP126P   | AACCCC        | CCC              | NP    | P     | 2         | 370         | 0.00541 | PAUHGM     |
| chr19      | 6230616 | MLLT1  | TFN123N  | ACCTTCA<br>AC | AAC              | TFN   | N     | 2         | 48          | 0.04167 | PAWVPZ     |
| chr19      | 6230620 | MLLT1  | TF123F   | ACCTTC        | TTC              | TF    | F     | 2         | 690         | 0.00290 | PAVDXR     |
| chr19      | 6230574 | MLLT1  | AG138G   | GCCGGC        | GGC              | AG    | G     | 2         | 175         | 0.01143 | PABYYR     |
| chr19      | 6230570 | MLLT1  | GG139G   | GCGGGG        | GGG              | GG    | G     | 2         | 1047        | 0.00191 | PAUWZR     |

## Figure S1

### VAF distribution of DNMT3A variants.

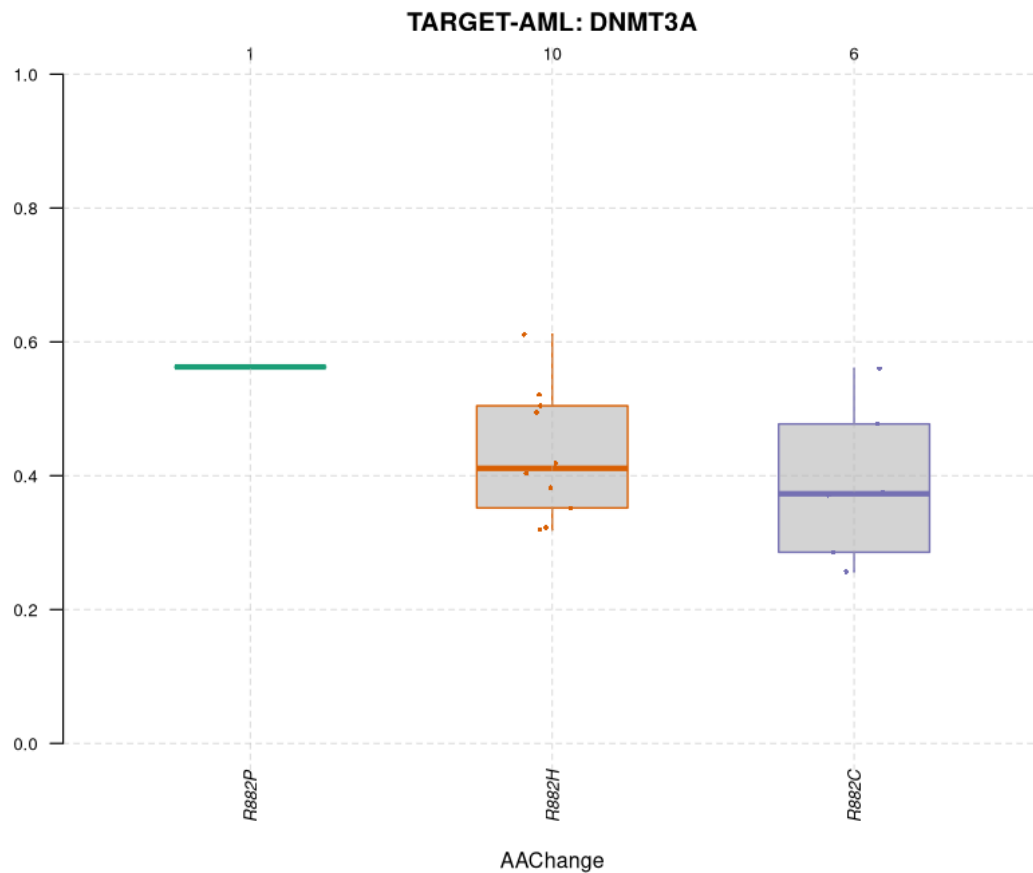

## Figure S2

### VAF distribution of H3K27 variants.

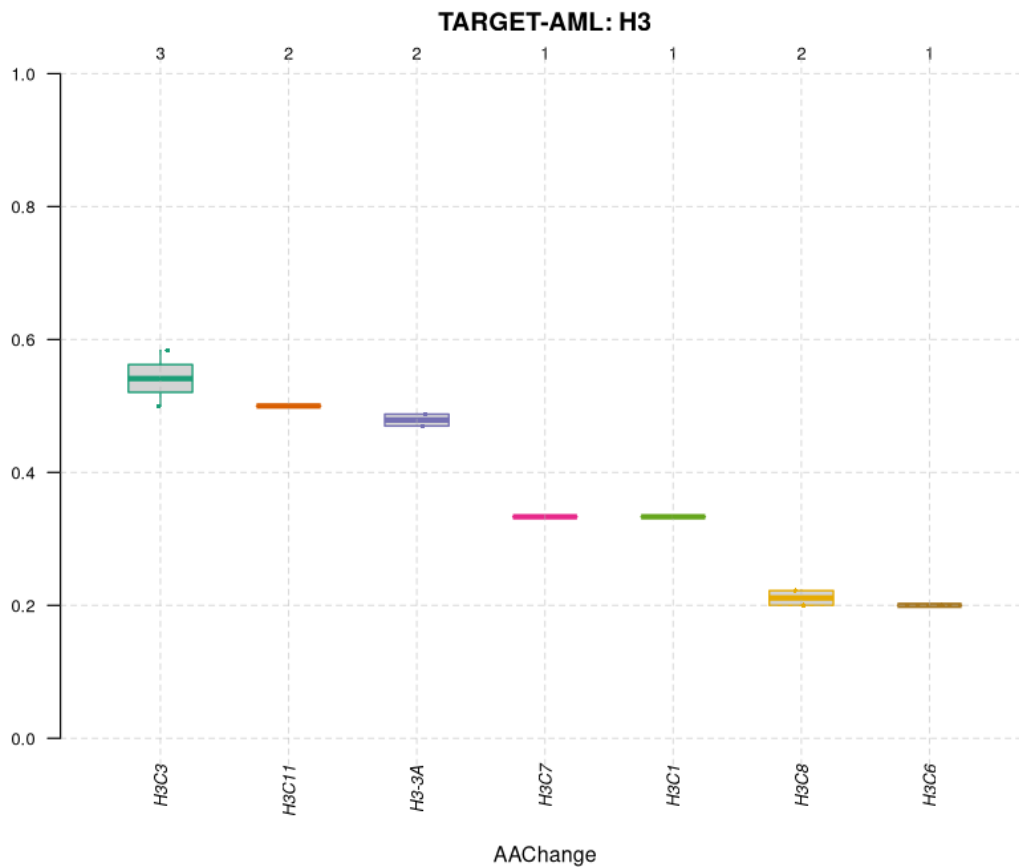

Supplement: NIHPP2023.09.15.558026v1-supplement-1.pdf [file NIHPP2023.09.15.558026v1-supplement-1.pdf]
